# Supplementary material
Source: MDPI journal article supplement (https://www.mdpi.com/2072-4292/16/4/683)
Supplement: s1 [file s1]

## Supplementary Material

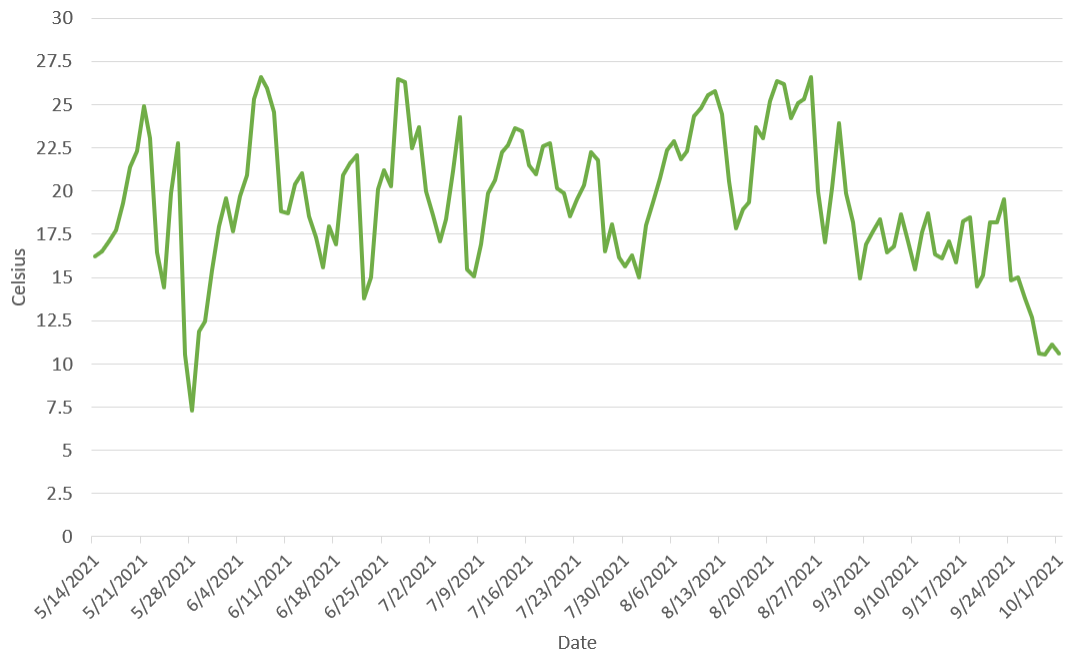

**Figure S1: Daily average air temperature for the 2021 growing season.**

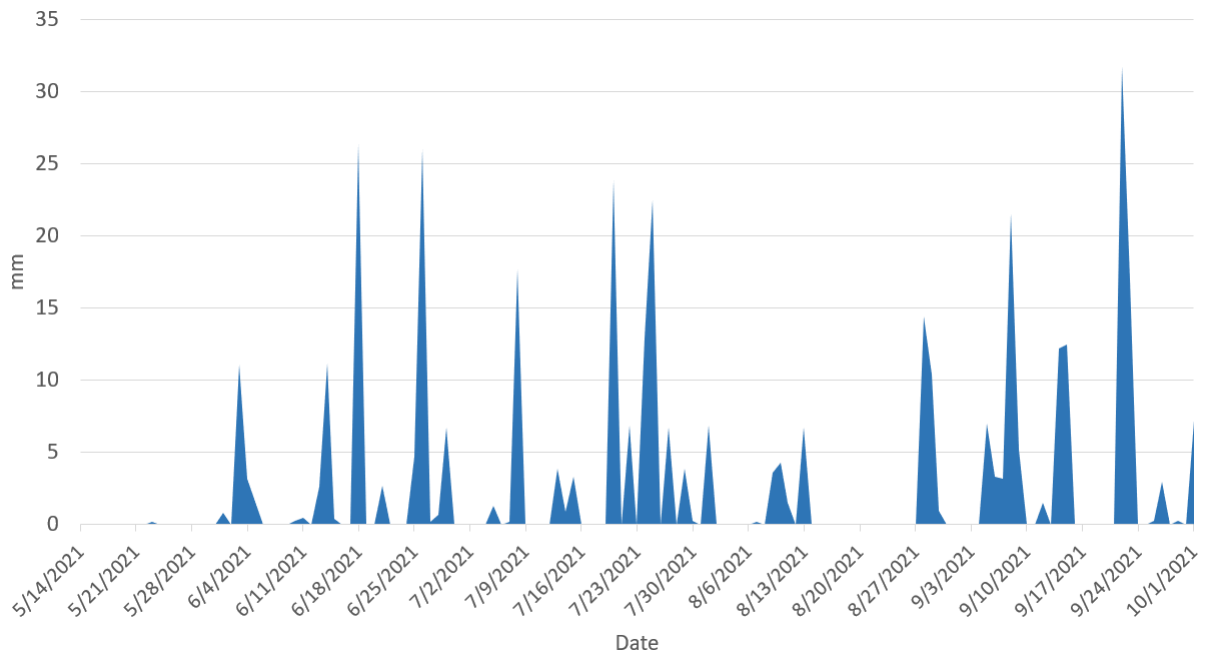

**Figure S2: Daily total precipitation for the 2021 growing season.**

**Table S1: Descriptive statistics for the raw yield (in bu/ac) for each field, where Std. Dev. = standard deviation, Max = maximum, Min = minimum, Q1 = quartile 1, Q3 = quartile 3, IQR = interquartile range, and  $n$  = number of samples.**

| Field | Mean  | Median | Std. Dev. | Max   | Min  | Q1    | Q3    | IQR  | $n$    |
|-------|-------|--------|-----------|-------|------|-------|-------|------|--------|
| 1     | 112.6 | 106.4  | 66.5      | 811.9 | 4.5  | 84.3  | 127.6 | 43.3 | 1038   |
| 2     | 146.3 | 136.5  | 80.7      | 836.2 | 1.2  | 105.7 | 173.0 | 67.3 | 1577   |
| 3     | 113.2 | 107.5  | 62.2      | 677.1 | 4.0  | 72.5  | 147.0 | 74.5 | 840    |
| 4     | 74.5  | 67.6   | 52.2      | 594.8 | 3.6  | 46.4  | 90.6  | 44.2 | 873    |
| 9     | 118.9 | 111.3  | 69.3      | 591.7 | 19.8 | 87.8  | 130.2 | 42.5 | 514    |
| 11    | 149.3 | 155.0  | 51.3      | 809.4 | 2.1  | 127.0 | 174.4 | 47.4 | 13,264 |

**Table S2: Descriptive statistics for the cleaned yield (in bu/ac) for each field, where Std. Dev. = standard deviation, Max = maximum, Min = minimum, Q1 = quartile 1, Q3 = quartile 3, IQR = interquartile range, and  $n$  = number of samples.**

| Field | Mean  | Median | Std. Dev. | Max   | Min  | Q1    | Q3    | IQR  | $n$  |
|-------|-------|--------|-----------|-------|------|-------|-------|------|------|
| 1     | 110.8 | 111.3  | 25.4      | 178.6 | 32.0 | 96.1  | 129.1 | 33.1 | 628  |
| 2     | 144.9 | 141.4  | 37.2      | 251.5 | 55.6 | 116.5 | 172.5 | 56.1 | 1175 |
| 3     | 117.3 | 112.4  | 41.7      | 219.2 | 21.0 | 83.0  | 149.1 | 66.0 | 617  |
| 4     | 76.6  | 73.9   | 25.4      | 148.2 | 26.0 | 58.0  | 93.7  | 35.7 | 584  |
| 9     | 116.0 | 115.8  | 19.7      | 177.8 | 65.1 | 102.8 | 128.6 | 25.8 | 301  |
| 11    | 153.3 | 159.2  | 34.6      | 274.2 | 16.8 | 137.9 | 176.8 | 38.9 | 9194 |

**Table S3: Descriptive statistics for the interpolated yield (in bu/ac) for each field, where Std. Dev. = standard deviation, Max = maximum, Min = minimum, Q1 = quartile 1, Q3 = quartile 3, IQR = interquartile range, and  $n$  = number of samples.**

| Field | Mean  | Median | Std. Dev. | Max   | Min  | Q1    | Q3    | IQR  | $n$    |
|-------|-------|--------|-----------|-------|------|-------|-------|------|--------|
| 1     | 107.8 | 108.0  | 17.1      | 150.0 | 62.5 | 96.7  | 119.7 | 23.1 | 2016   |
| 2     | 147.3 | 142.8  | 31.5      | 217.2 | 92.2 | 122.8 | 167.9 | 45.1 | 1589   |
| 3     | 121.6 | 119.0  | 40.4      | 200.1 | 24.4 | 88.4  | 156.5 | 68.1 | 1086   |
| 4     | 74.9  | 70.4   | 21.2      | 120.3 | 34.9 | 57.7  | 92.9  | 35.3 | 675    |
| 9     | 117.3 | 115.8  | 15.0      | 172.0 | 87.2 | 106.8 | 124.7 | 17.9 | 610    |
| 11    | 159.9 | 162.0  | 21.8      | 217.4 | 50.4 | 149.1 | 174.3 | 25.2 | 24,662 |

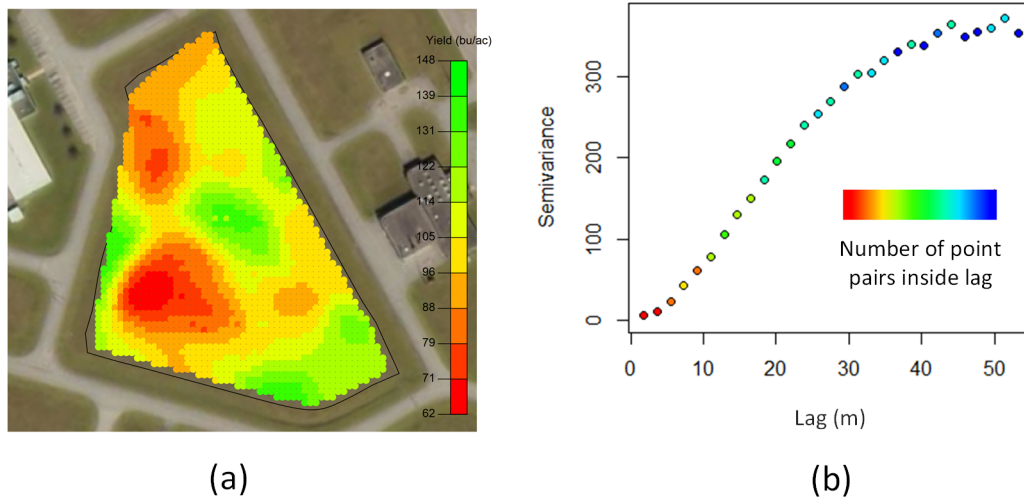

**Figure S3: SA illustrative example, where chart a) is a precision map of the interpolated yield for Field 1, and chart b) is the corresponding variogram using a maximum distance of 55 m and lag tolerance of 50%.**
